# Supplementary material
Source: publisher figshare collection journal article supplement (https://tandf.figshare.com/articles/dataset/_/1054789)
Supplement: Supplementary file 1 [file 2]

## **APPENDIX A: METHODOLOGY FOR DETERMINING CRASH SCENARIOS**

### **Objective and Data Source**

The objective of the pre-crash developed for this study was to group collisions in national crash databases by similar pre-crash configurations. To accomplish this goal, we examined three variables available in many of the NHTSA crash test databases: pre-crash critical event, accident type, and pre-crash movement.

The databases used for this study (NASS/GES, NASS/CDS, FARS, and NMVCCS) are provided by NHTSA to the public via download (<ftp://ftp.nhtsa.dot.gov/>). Files are sometimes modified from their original release, to correct mistakes in the data. GES 2010 files were dated October 11, 2011 and 2011 files were dated December 9, 2012. CDS 2007 files were dated August 15, 2008, 2008 files were dated December 1, 2011, 2009 files were dated September 20, 2010, 2010 files were dated September 11, 2011, and 2011 files were dated December 18, 2012. FARS 2010 files were dated July 31, 2012 and 2011 files were dated August 14, 2012. The NMVCCS file was dated July 20, 2008.

### **Crash Scenario Approach**

In the NHTSA databases, the critical pre-crash event, pre-crash movement, and accident type variables provide information about the configuration and driver maneuvers prior to each vehicle. Figure A1 shows the approach developed for this study to classify collisions using database variables. Example values for each variable are provided below for the striking vehicle of the rear-end crash shown above. The critical pre-crash event is the event that made the crash imminent as determined by the investigator. The databases in our study had 92 critical event categories. The accident type variable describes the configuration of the crash for the first harmful event and has approximately 100 values. Finally, the pre-crash movement describes the vehicle's activity prior to the crash, such as decelerating in lane, passing, or going straight. Together these three variables were used to assign every vehicle in each database a pre-crash scenario. Each crash was assigned a scenario based upon the actions of the two vehicles involved in the first harmful event in the crash.

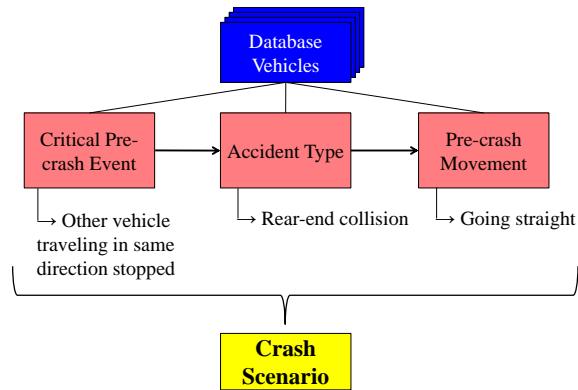

**Figure A1. Approach for Determining Pre-Crash Scenario from NASS/CDS Variables.**

Figure A2 shows photographs taken as part of a fatal rear-end collision involving a 2010 Ford Fusion (bottom of Figure A2) which struck a 2007 Subaru Impreza (top), which was stopped in traffic. The case was investigated as part of the CDS database (Case 2010-82-137). This case is an example of a crash that would be applicable to a forward crash avoidance system. The driver of the Impreza, a 37-year-old male, was fatally injured (brain stem transection) while a 3-year-old female in a child seat in the middle position of the back seat only suffered moderate injuries (a foot fracture and lung contusion). The driver of the Fusion was a 49-year-old male who had a 0.0 blood alcohol concentration as measured by a police administered test. The driver of the striking vehicle was seriously injured with bilateral rib fractures that required a 9-day hospitalization.

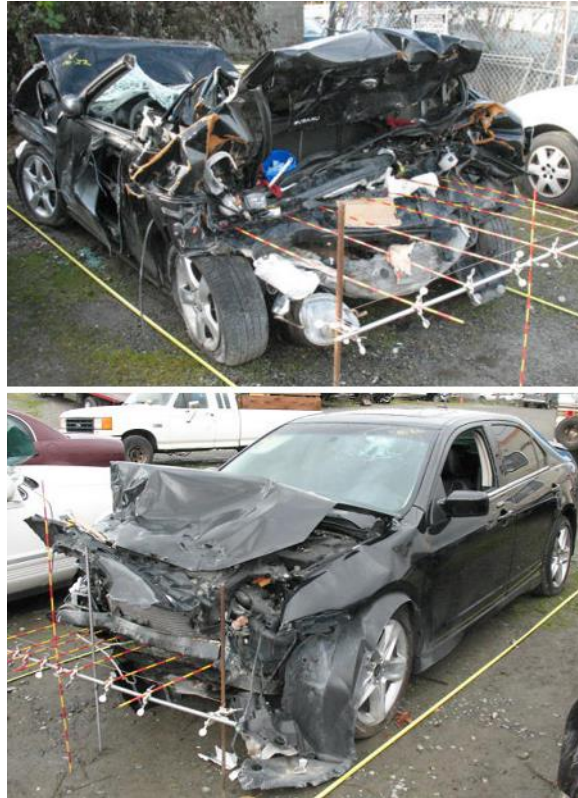

**Figure A2. Photograph from NASS/CDS Investigation of a Fatal Rear-end Collision (Case 2010-82-137).**

In many cases the critical pre-crash event and accident type variables indicate very similar information, such as in the example rear-end crash above. The accident type variable corresponds to the first impact in a crash whereas the critical pre-crash event describes what made the first pre-crash event unavoidable. In some scenarios this can lead to meaningful differences with regard to if an active safety system would activate. Consider NASS/CDS case 2011-41-116 whose scene diagram is shown in the left of Figure A3. Vehicle 1, a 2001 Mercedes Benz E-class departed its lane and struck vehicle 2, which was stopped. The pre-crash critical event for the striking vehicle was “this vehicle traveling over the left lane line” and the accident type was a rear-end collision. The pre-crash maneuver of the striking vehicle was going straight, not changing lanes or avoiding another critical event. For the study of active safety systems, this crash would most likely be mitigated by a Lane Departure Warning (LDW) system that could have warned the driver he was exiting his lane.

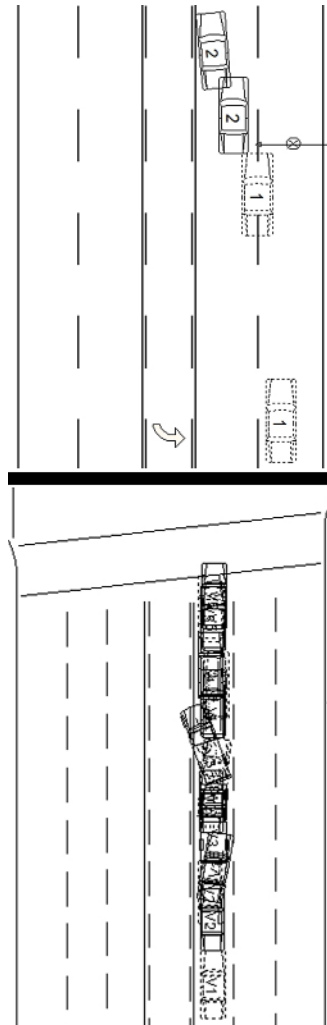

**Figure A3. Scene Diagram Prepared by Investigator for NASS/CDS Cases 2011-41-116 (Left) and 2010-82-137 (Right).**

Compare this rear-end crash with the one involving the Fusion and Impreza, shown in the right of Figure A3. FCAS could more likely be applicable to this crash because the struck vehicle would have been in view of the front-facing sensors in time to either deliver a warning or take action. In our approach to assign pre-crash scenarios, the pre-crash critical event was prioritized over accident type because it described the portion of the pre-crash phase where active safety systems would activate more completely.

### **Crash Scenarios**

Figure A4 shows the single vehicle crash scenarios: single vehicle crashes with fixed objects on the roadside, control loss, animal in the road, pedestrian or cyclist in the road, object in the road, and other.

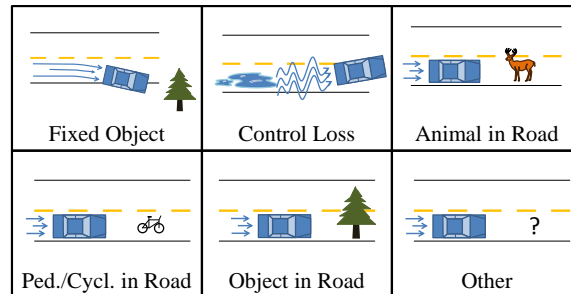

**Figure A4. Single Vehicle Crash Scenario Categories.**

Similarly, scenarios for multiple vehicle collision are shown in Figure A5. For target population analysis, many of these crashes can be broken down further into subgroups based on pre-crash maneuver (e.g. turning, going straight) or by object struck.

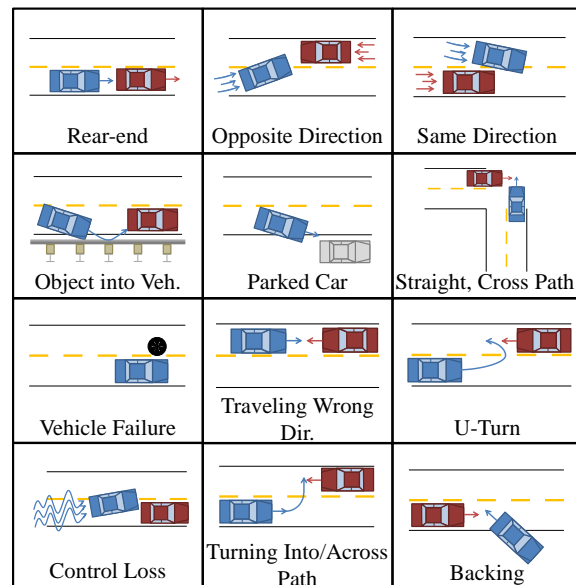

**Figure A5. Multi-Vehicle Crash Scenario Categories.**

Table A1 lists the distribution of pre-crash scenarios by the number of all severity, tow-away, and fatal crashes. Table A2 lists the distribution of pre-crash scenarios for all occupants, seriously injured occupants, and fatalities.

NHTSA uses a pre-crash envelope definition of the pre-crash that describes what caused the crash to become unavoidable. Using the general crash scenarios developed here, more detailed analysis can be performed. For example, the number of control loss crashes potentially caused by weather can be examined by tabulate the weather conditions for crashes in the control loss category.

**Table A1. Distribution of Crash Scenarios for All Severity (GES 2010-2011), Tow-Away Severity (NASS/CDS 2007-2011), and Fatal Severity (FARS 2010-2011)**

| Scenario                                | Crashes            |                |              | % Crashes          |                |              |
|-----------------------------------------|--------------------|----------------|--------------|--------------------|----------------|--------------|
|                                         | All Severity (GES) | Tow-Away (CDS) | Fatal (FARS) | All Severity (GES) | Tow-Away (CDS) | Fatal (FARS) |
| No Scenario                             | 262,843            | 113,458        | 1,703        | 3%                 | 1%             | 3%           |
| Sing Veh - Departure                    | 1,246,953          | 1,777,338      | 18,041       | 12%                | 17%            | 32%          |
| Sing Veh - Control Loss                 | 767,361            | 1,164,234      | 6,293        | 7%                 | 11%            | 11%          |
| Sing Veh - Animal in Road               | 551,988            | 196,984        | 648          | 5%                 | 2%             | 1%           |
| Sing Veh - Ped/Cyclist in Road          | 173,260            | 9,950          | 6,684        | 2%                 | 0%             | 12%          |
| Sing Veh - Object in Road               | 52,144             | 54,127         | 90           | 1%                 | 1%             | 0%           |
| Sing Veh - Other                        | 162,961            | 57,421         | 909          | 2%                 | 1%             | 2%           |
| Mult Veh - Rear-end                     | 3,375,457          | 2,526,304      | 3,723        | 32%                | 25%            | 7%           |
| Mult Veh - Opp Dir, no turning          | 135,545            | 239,757        | 5,549        | 1%                 | 2%             | 10%          |
| Mult Veh - Same Dir, no turning         | 692,601            | 253,402        | 849          | 7%                 | 2%             | 1%           |
| Mult Veh - Control Loss                 | 165,194            | 272,652        | 1,832        | 2%                 | 3%             | 3%           |
| Mult Veh - Object into Vehicle          | 0                  | 27,046         | 4            | 0%                 | 0%             | 0%           |
| Mult Veh - Parked Car                   | 7,715              | 211,209        | 291          | 0%                 | 2%             | 1%           |
| Mult Veh - Crossing Path, Both Straight | 703,792            | 909,727        | 3,971        | 7%                 | 9%             | 7%           |
| Mult Veh - Turning Into/Across Path     | 1,676,597          | 2,193,720      | 4,409        | 16%                | 21%            | 8%           |
| Mult Veh - Wrong Direction              | 10,127             | 26,216         | 569          | 0%                 | 0%             | 1%           |
| Mult Veh - U-turn                       | 76,535             | 68,417         | 226          | 1%                 | 1%             | 0%           |
| Mult Veh - Backing                      | 166,700            | 30,525         | 51           | 2%                 | 0%             | 0%           |
| Vehicle Failure                         | 74,029             | 107,784        | 530          | 1%                 | 1%             | 1%           |
| Multiple/Conflicting Scenarios          | 97,043             | 23,563         | 283          | 1%                 | 0%             | 0%           |
| No Driver                               | 5,717              | 4,018          | 90           | 0%                 | 0%             | 0%           |
| Total                                   | 10,404,563         | 10,267,849     | 56,745       | 100%               | 100%           | 100%         |

**Table A2. Distribution of Scenarios for All Occupants (GES 2010-2011), Seriously Injured Occupants (NASS/CDS 2007-2011), and Fatalities (FARS 2010-2011)**

| Scenario                                | Occupants (All/Injured/Fatalities) |                         |                      | % Occupants       |                         |                      |
|-----------------------------------------|------------------------------------|-------------------------|----------------------|-------------------|-------------------------|----------------------|
|                                         | All Occ.<br>(GES)                  | MAIS3+<br>Occ.<br>(CDS) | Fatalities<br>(FARS) | All Occ.<br>(GES) | MAIS3+<br>Occ.<br>(CDS) | Fatalities<br>(FARS) |
| No Scenario                             | 2,878,851                          | 4,315                   | 1,885                | 4%                | 1%                      | 3%                   |
| Sing Veh - Departure                    | 7,150,105                          | 109,596                 | 19,234               | 10%               | 31%                     | 31%                  |
| Sing Veh - Control Loss                 | 2,834,048                          | 50,972                  | 6,876                | 4%                | 15%                     | 11%                  |
| Sing Veh - Animal in Road               | 2,133,696                          | 1,205                   | 668                  | 3%                | 0%                      | 1%                   |
| Sing Veh - Ped/Cyclist in Road          | 1,428,773                          | 0                       | 6,743                | 2%                | 0%                      | 11%                  |
| Sing Veh - Object in Road               | 100,626                            | 23                      | 97                   | 0%                | 0%                      | 0%                   |
| Sing Veh - Other                        | 1,605,906                          | 1,007                   | 965                  | 2%                | 0%                      | 2%                   |
| Mult Veh - Rear-end                     | 26,178,075                         | 25,375                  | 4,122                | 35%               | 7%                      | 7%                   |
| Mult Veh - Opp Dir, no turning          | 1,397,609                          | 38,897                  | 6,712                | 2%                | 11%                     | 11%                  |
| Mult Veh - Same Dir, no turning         | 7,801,025                          | 5,748                   | 948                  | 10%               | 2%                      | 2%                   |
| Mult Veh - Control Loss                 | 1,214,458                          | 18,084                  | 2,126                | 2%                | 5%                      | 3%                   |
| Mult Veh - Object into Vehicle          | 0                                  | 2,122                   | 5                    | 0%                | 1%                      | 0%                   |
| Mult Veh - Parked Car                   | 38,804                             | 2,444                   | 348                  | 0%                | 1%                      | 1%                   |
| Mult Veh - Crossing Path, Both Straight | 5,357,616                          | 27,460                  | 4,459                | 7%                | 8%                      | 7%                   |
| Mult Veh - Turning Into/Across Path     | 11,802,498                         | 54,477                  | 4,682                | 16%               | 16%                     | 8%                   |
| Mult Veh - Wrong Direction              | 52,844                             | 2,909                   | 704                  | 0%                | 1%                      | 1%                   |
| Mult Veh - U-turn                       | 594,974                            | 1,491                   | 239                  | 1%                | 0%                      | 0%                   |
| Mult Veh - Backing                      | 1,228,037                          | 177                     | 55                   | 2%                | 0%                      | 0%                   |
| Vehicle Failure                         | 272,519                            | 4,023                   | 636                  | 0%                | 1%                      | 1%                   |
| Multiple/Conflicting Scenarios          | 1,166,662                          | 319                     | 321                  | 2%                | 0%                      | 1%                   |
| No Driver                               | 2,377                              | 0                       | 94                   | 0%                | 0%                      | 0%                   |
| Total                                   | 75,239,504                         | 350,645                 | 61,919               | 100%              | 100%                    | 100%                 |

## Target Populations for Active Safety Systems

This section tabulates the annual number of crash that are applicable to each of the four active safety systems examined for this study. The data in these tables was used to create **Error! Reference source not found.** and **Error! Reference source not found.** in the body of this paper. Table A3 lists the number of annual number of all severity, serious injury, and fatal crashes that could be potentially mitigated by each active safety system.

**Table A3. Annual Number of All Severity, Serious Injury, and Fatal Crashes Applicable to Active Safety Systems**

| Category                        | Group                                  | FCW       | PCAS             | LDW     | V2V/V2I   | Combined  |
|---------------------------------|----------------------------------------|-----------|------------------|---------|-----------|-----------|
| <b>Pre-Crash Scenario</b>       | All Crashes                            | 1,583,155 | 48,077           | 713,433 | 1,031,811 | 3,376,476 |
|                                 | MAIS3+ Crashes                         | 3,921     | 0 <sup>†</sup>   | 23,822  | 14,208    | 41,951    |
|                                 | Fatal Crashes                          | 1,833     | 3,051            | 12,357  | 4,422     | 21,662    |
|                                 |                                        |           |                  |         |           |           |
|                                 | % Distraction Critical Reason (NMVCCS) | 53%       | 53% <sup>‡</sup> | 24%     | 51%       | 34%       |
|                                 |                                        |           |                  |         |           |           |
| <b>Adjusted for Distraction</b> | All Crashes                            | 838,387   | 25,460           | 167,855 | 338,939   | 1,155,258 |
|                                 | MAIS3+ Crashes                         | 2,076     | 0 <sup>†</sup>   | 5,605   | 4,667     | 14,353    |
|                                 | Fatal Crashes                          | 970       | 1,615            | 2,907   | 1,453     | 7,412     |

<sup>†</sup>NASS/CDS does not include crashes with pedestrians and cyclists

<sup>‡</sup>NMVCCS also does not contain pedestrian crashes. For this study we assumed the proportion of distracted drivers in PCAS crashes would be the same as that for FCW applicable crashes.



## APPENDIX B: CATEGORIES OF CRITICAL REASON IN NMVCCS

The critical reason for a crash in NMVCCS could have a possible 67 levels, which are grouped by similar critical reason to get 11 primary categories, summarized in Table B1.

**Table B1. Examples of Critical Reasons Categories from NMVCCS Coded Critical Reason**

| Derived Category            | Example (critical reason from NMVCCS)                            |
|-----------------------------|------------------------------------------------------------------|
| Non-Performance Error       | Sleeping                                                         |
|                             | Heart attack or other physical impairment                        |
|                             | Other Critical Non-performance                                   |
| Distraction                 | Inattention (i.e. daydreaming)                                   |
|                             | Internal Distraction                                             |
|                             | External Distraction                                             |
|                             | Inadequate Surveillance                                          |
| Speed Related               | Too fast for conditions                                          |
|                             | Too fast to respond                                              |
|                             | Too fast for curve/turn                                          |
| Judgment Error              | Misjudged gap or other's speed                                   |
|                             | Following too Closely                                            |
|                             | False Assumption of Other's Actions                              |
| Illegal Maneuver            | e.g. Illegal Passing, turned from wrong lane                     |
| Aggressive Acts             | Rapid/Frequent Lane Change, Rapid Accelerating, Obscene Gestures |
| Inadequate Evasive Maneuver | Inadequate Action (e.g. braking only)                            |
|                             | Incorrect Action                                                 |
| Performance Error           | Panic/Freeze                                                     |
|                             | Overcompensation                                                 |
|                             | Poor Direction Control                                           |
| Vehicle Failure             | Brakes Failed                                                    |
|                             | Tires/Wheels Failed                                              |
|                             | Steering Failed                                                  |
|                             | Transmission/Engine Failure                                      |
|                             | Cargo Shifted                                                    |
| Highway Conditions          | Signs/Signals Missing                                            |
|                             | View Obstructed by Road Design                                   |
|                             | Maintenance Problems                                             |
|                             | Slick Roads                                                      |
| Environmental Conditions    | Rain, snow                                                       |
|                             | Fog                                                              |
|                             | Glare                                                            |
|                             | Blowing Debris                                                   |

## APPENDIX C: SAS SOURCE CODE FOR DETERMINATION OF PRE-CRASH SCENARIOS

This appendix contains the source code for determining pre-crash scenarios used in this paper. Code is presented for NASS/CDS. To run the code, the user must download the NASS/CDS case year 2011 files from <ftp://ftp.nhtsa.dot.gov/>. The user should change both “libname” statements in File 1 to the location of the NASS/CDS SAS files. NASS/GES, FARS, and NMVCCS pre-crash scenarios can be found in similar fashion. This source code is also available for download online at <http://www.kriskusano.com/precrash>. At the end of the process, the distribution of crash scenarios should match Table B1 (note the data is unweighted).

**Table C1. Crash Scenarios for NASS/CDS 2011**

| <b>Scenario (crash_scen)</b>            | <b>Frequency (unweighted)</b> |
|-----------------------------------------|-------------------------------|
| Mult Veh - Turning Into/Across Path     | 934                           |
| Sing Veh - Departure                    | 922                           |
| Mult Veh - Rear-end                     | 788                           |
| Mult Veh - Crossing Path, Both Straight | 497                           |
| Sing Veh - Control Loss                 | 400                           |
| Mult Veh - Opp Dir, no turning          | 173                           |
| Mult Veh - Same Dir, no turning         | 118                           |
| Mult Veh - Control Loss                 | 112                           |
| Mult Veh - Parked Car                   | 87                            |
| No Scenario                             | 55                            |
| Mult Veh - U-turn                       | 46                            |
| Sing Veh - Animal in Road               | 46                            |
| Mult Veh - Object into Vehicle          | 26                            |
| Vehicle Failure                         | 26                            |
| Sing Veh - Object in Road               | 14                            |
| Mult Veh - Wrong Direction              | 13                            |
| Mult Veh - Backing                      | 8                             |
| Multiple/Conflicting Scenarios          | 6                             |
| Sing Veh - Other                        | 6                             |
| Sing Veh - Ped/Cyclist in Road          | 1                             |
| Total                                   | 4278                          |
